# Supplementary material
Source: ML conference proceedings conference paper supplement (https://proceedings.neurips.cc/paper_files/paper/2011/hash/ffeabd223de0d4eacb9a3e6e53e5448d-Abstract.html)
Supplement: Supplementary file 1 [file ffeabd223de0d4eacb9a3e6e53e5448d-Supplemental.zip]

## Appendix

### A Proofs

*Proof of Theorem 2.* Fix  $\epsilon > 0$  and let  $\mathbf{x}^*(\epsilon) \in \text{conv}(\mathcal{A})$  be such that

$$f(\mathbf{x}^*(\epsilon)) \leq \inf_{\mathbf{x} \in \text{conv}(\mathcal{A})} f(\mathbf{x}) + \epsilon .$$

Using smoothness we get, for any  $\alpha$ ,

$$\begin{aligned} f(\mathbf{x}_t + \alpha(\mathbf{a}_t - \mathbf{x}_t)) &\leq f(\mathbf{x}_t) + \alpha \langle \nabla f(\mathbf{x}_t), \mathbf{a}_t - \mathbf{x}_t \rangle + \frac{L}{r} \alpha^r \|\mathbf{a}_t - \mathbf{x}_t\|^r \\ &\leq f(\mathbf{x}_t) + \alpha \langle \nabla f(\mathbf{x}_t), \mathbf{a}_t - \mathbf{x}_t \rangle + \frac{L}{r} \alpha^r (\|\mathbf{a}_t\| + \|\mathbf{x}_t\|)^r \\ &\leq f(\mathbf{x}_t) - \alpha (\langle \nabla f(\mathbf{x}_t), \mathbf{a}_t \rangle + \langle \nabla f(\mathbf{x}_t), \mathbf{x}_t \rangle) + \frac{L}{r} (2R\alpha)^r . \end{aligned} \quad (9)$$

The second inequality follows by triangle inequality. The last inequality follows because  $\|\mathbf{a}_t\|, \|\mathbf{x}_t\| \leq R$ . Now, by convexity of  $f$ ,

$$\begin{aligned} \delta_t := f(\mathbf{x}_t) - f(\mathbf{x}^*(\epsilon)) &\leq \langle \nabla f(\mathbf{x}_t), \mathbf{x}_t - \mathbf{x}^*(\epsilon) \rangle \\ &\leq \langle \nabla f(\mathbf{x}_t), \mathbf{x}_t \rangle + \langle -\nabla f(\mathbf{x}_t), \mathbf{x}^*(\epsilon) \rangle \\ &\leq \langle \nabla f(\mathbf{x}_t), \mathbf{x}_t \rangle + \langle -\nabla f(\mathbf{x}_t), \mathbf{a}_t \rangle . \end{aligned} \quad (10)$$

The last inequality holds because  $\mathbf{a}_t$  maximized the linear functional  $\langle -\nabla f(\mathbf{x}_t), \cdot \rangle$  over  $\mathcal{A}$  and hence also over  $\text{conv}(\mathcal{A})$ . Thus,  $\langle -\nabla f(\mathbf{x}_t), \mathbf{a}_t \rangle \geq \langle -\nabla f(\mathbf{x}_t), \mathbf{x}^*(\epsilon) \rangle$  as  $\mathbf{x}^*(\epsilon) \in \text{conv}(\mathcal{A})$ . Plugging (10) into (9), we have, for any  $\alpha \geq 0$ ,

$$f(\mathbf{x}_t + \alpha(\mathbf{a}_t - \mathbf{x}_t)) \leq f(\mathbf{x}_t) - \alpha \delta_t + \frac{L}{r} (2R\alpha)^r .$$

Since  $\mathbf{x}_{t+1}$  is chosen by minimizing the LHS over  $\alpha \in [0, 1]$ , we have

$$f(\mathbf{x}_{t+1}) \leq f(\mathbf{x}_t) + \min_{\alpha \in [0, 1]} \left( -\alpha \delta_t + \frac{L}{r} (2R\alpha)^r \right) .$$

Thus, we have, for all  $t \geq 0$ ,

$$\delta_{t+1} \leq \delta_t + \min_{\alpha \in [0, 1]} \left( -\alpha \delta_t + \frac{L}{r} (2R\alpha)^r \right) .$$

For  $t = 0$ , choose  $\alpha = 1$  on the RHS to get  $\delta_1 \leq L(2R)^r/r$ . Since  $\delta_t$ 's are monotonically non-increasing, this shows  $\delta_t \leq L(2R)^r/r$  for all  $t \geq 1$ . Hence, for  $t \geq 1$ , we can choose  $\alpha$  such that  $\alpha^{r-1} = \delta_t/(L2^r R^r) \in [0, \frac{1}{r}]$  on the RHS to get

$$\forall t \geq 1, \quad \delta_{t+1} \leq \delta_t - \left( 1 - \frac{1}{r} \right) \frac{\delta_t^{\frac{r}{r-1}}}{L^{\frac{1}{r-1}} (2R)^{\frac{r}{r-1}}} .$$

Solving this recursion easily gives, for all  $t \geq 1$ ,

$$f(\mathbf{x}_{t+1}) - f(\mathbf{x}^*) \leq \frac{K_r L R^r}{t^{r-1}} ,$$

for some  $K_r$  that depends only on  $r$ . □

*Proof of Corollary 3.* Since  $h \in \text{conv}(\mathcal{A})$  and  $\|\cdot\|_{\#}$  is equivalent to  $\|\cdot\|$ , we have

$$\inf_{g \in \text{conv}(\mathcal{A})} \|h - g\|_{\#}^p = 0 .$$

Thus, using  $p$ -uniform smoothness of  $\|\cdot - h\|_{\#}^p$ , Theorem 2 gives

$$\|g_{t+1} - h\|_{\#}^p = O(t^{-p+1}) .$$

The corollary now follows by again noting the equivalence of the two norms. □
